# Supplementary material for: Na+/vacancy disordered manganese-based oxide cathode with ultralow strain enabled by tuning charge distribution
Source: Royal Society of Chemistry journal article supplement (doi:10.1039/d2ta00688j), 2022-01-01
Supplement: d2ta00688j1.pdf [file d2ta00688j1.pdf]

1 **Supporting Information for**

2 **Na<sup>+</sup>/Vacancy Disordered Manganese-Based Oxide Cathode with**  
3 **Ultralow Strain Enabled by Tuning Charge Distribution**

4 Siyuan Li,<sup>a,#</sup> Yangyang Zhang,<sup>a,#</sup> Kaixiang Lei,<sup>a,\*</sup> Qian Yang,<sup>a</sup> Zheng Liu,<sup>a</sup>

5 Kezhu Jiang,<sup>a,\*</sup> Fujun Li,<sup>b</sup> Qiongqiong Lu,<sup>c</sup> Daria Mikhailova,<sup>c</sup> Shijian Zheng<sup>a,\*</sup>

6 <sup>a</sup> State Key Laboratory of Reliability and Intelligence of Electrical Equipment, School of  
7 Materials Science and Engineering, Hebei University of Technology, Tianjin 300401, China

8 <sup>b</sup> Key Laboratory of Advanced Energy Materials Chemistry (Ministry of Education), College  
9 of Chemistry, Nankai University, Tianjin 300071, China

10 <sup>c</sup> Leibniz Institute for Solid State and Materials Research (IFW), Dresden e.V, Helmholtzstraße  
11 20, D-01069, Dresden, Germany

12 <sup>#</sup>These authors contributed equally to this work.

13

14 <sup>\*</sup>To whom correspondence should be addressed. E-mail: kaixianglei@hebut.edu.cn;

15 sjzheng@hebut.edu.cn; fujunli@nankai.edu.cn

16

17

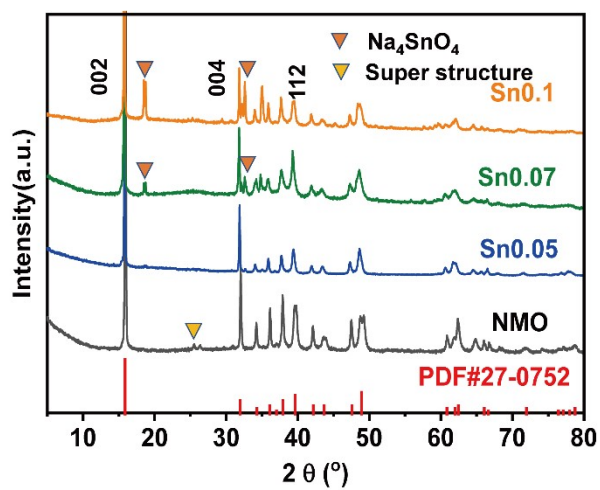

1

2 **Fig. S1.** XRD patterns of  $\text{Na}_{0.67}\text{Sn}_x\text{Mn}_{1-x}\text{O}_2$  ( $x=0, 0.05, 0.07, 0.10$ ).

3

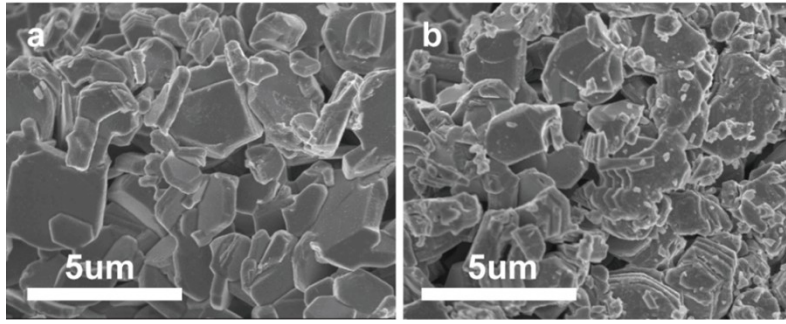

1

2 **Fig. S2.** SEM images of (a) NMO and (b) NSMO.

3

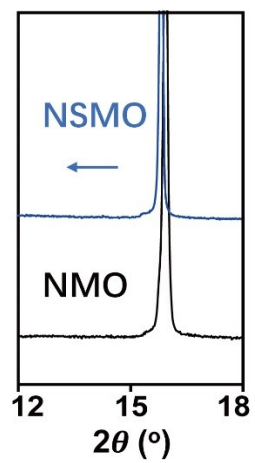

1

2 **Fig. S3.** Enlarged XRD patterns of NMO and NSMO from 12° to 18°.

3

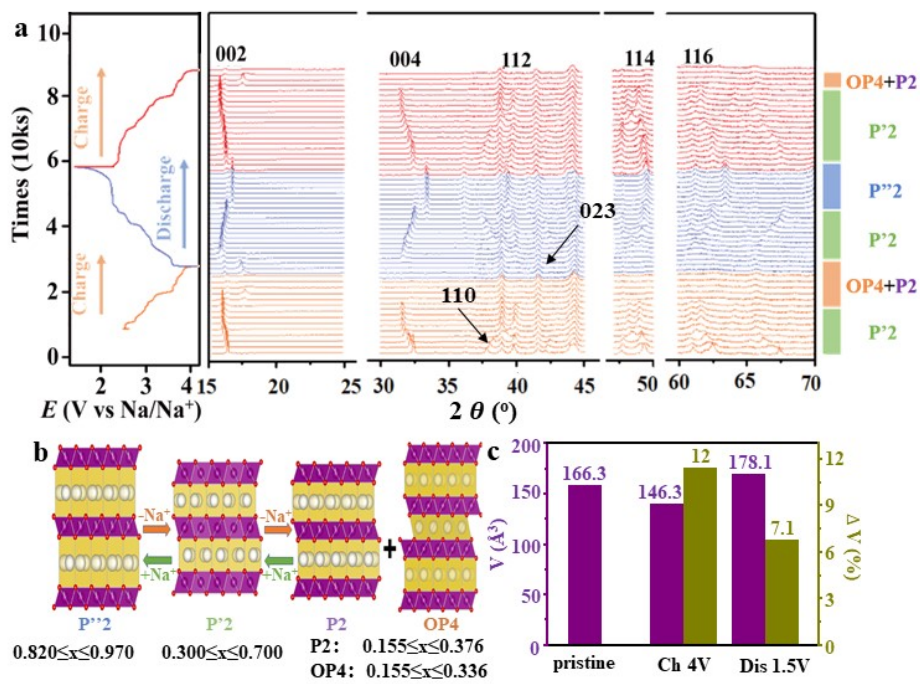

1

2 **Fig. S4.** Structural evolution of NMO electrode. (a) *In-situ* XRD patterns. (b) Illustration of phase transition  
 3 during cycles. (c) Volume variations upon Na<sup>+</sup> extraction and insertion.

4

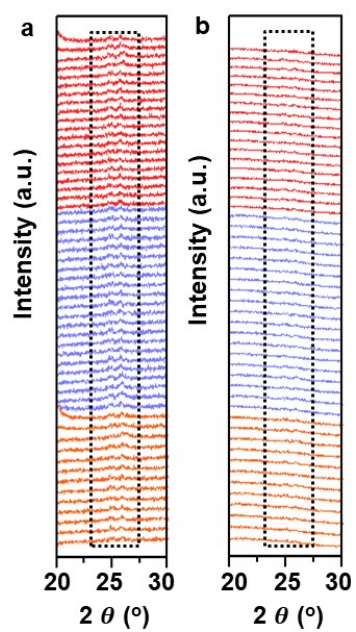

1

2 **Fig. S5.** Enlarged *in-situ* XRD patterns of (a) NMO and (b) NSMO between 20° and 30°.

3

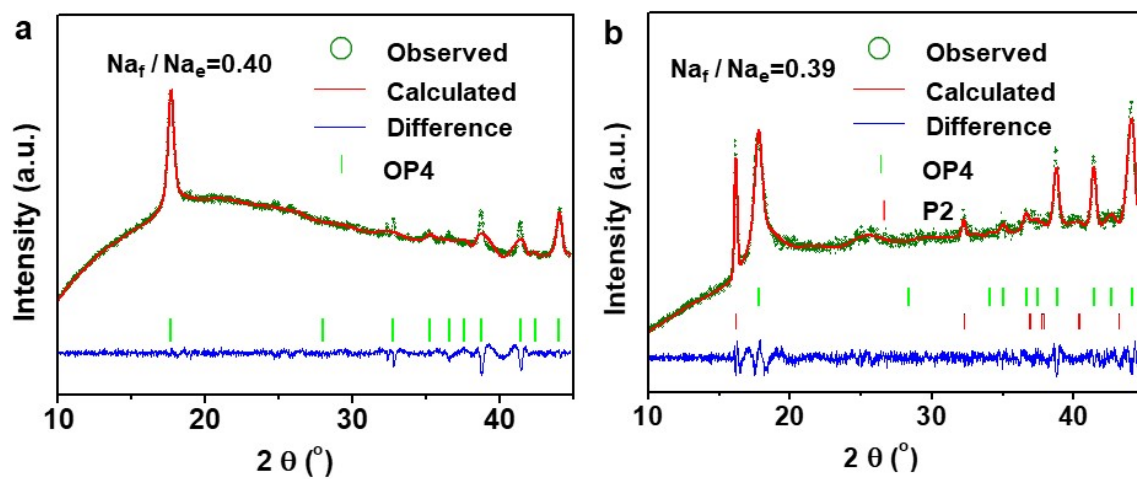

1

2 **Fig. S6.** Rietveld refinement profiles of the powder XRD data for the charged (a) NSMO and (b) NMO  
 3 electrodes.

4

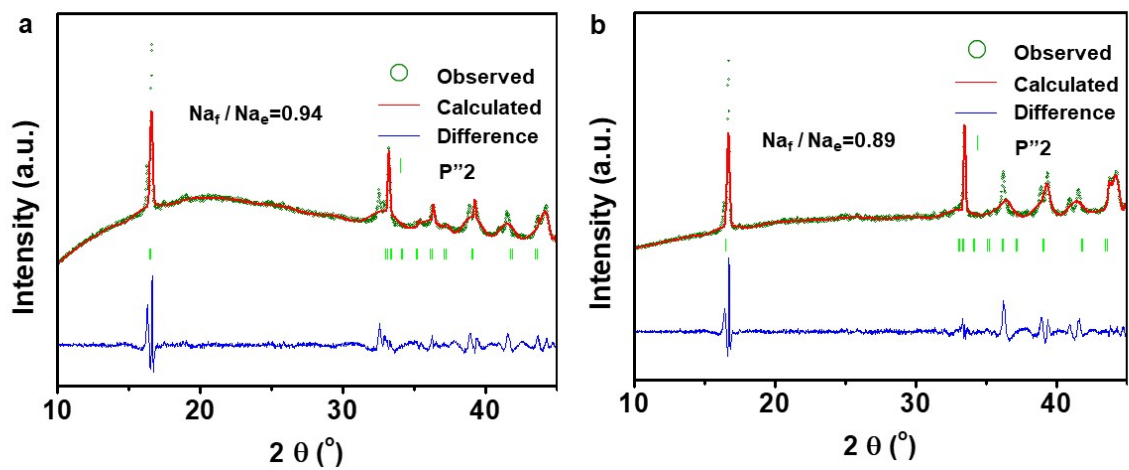

1

2 Fig. S7. Rietveld refinement of powder XRD data for (a) NSMO and (b) NMO electrodes cycled at 1.5 V.

3



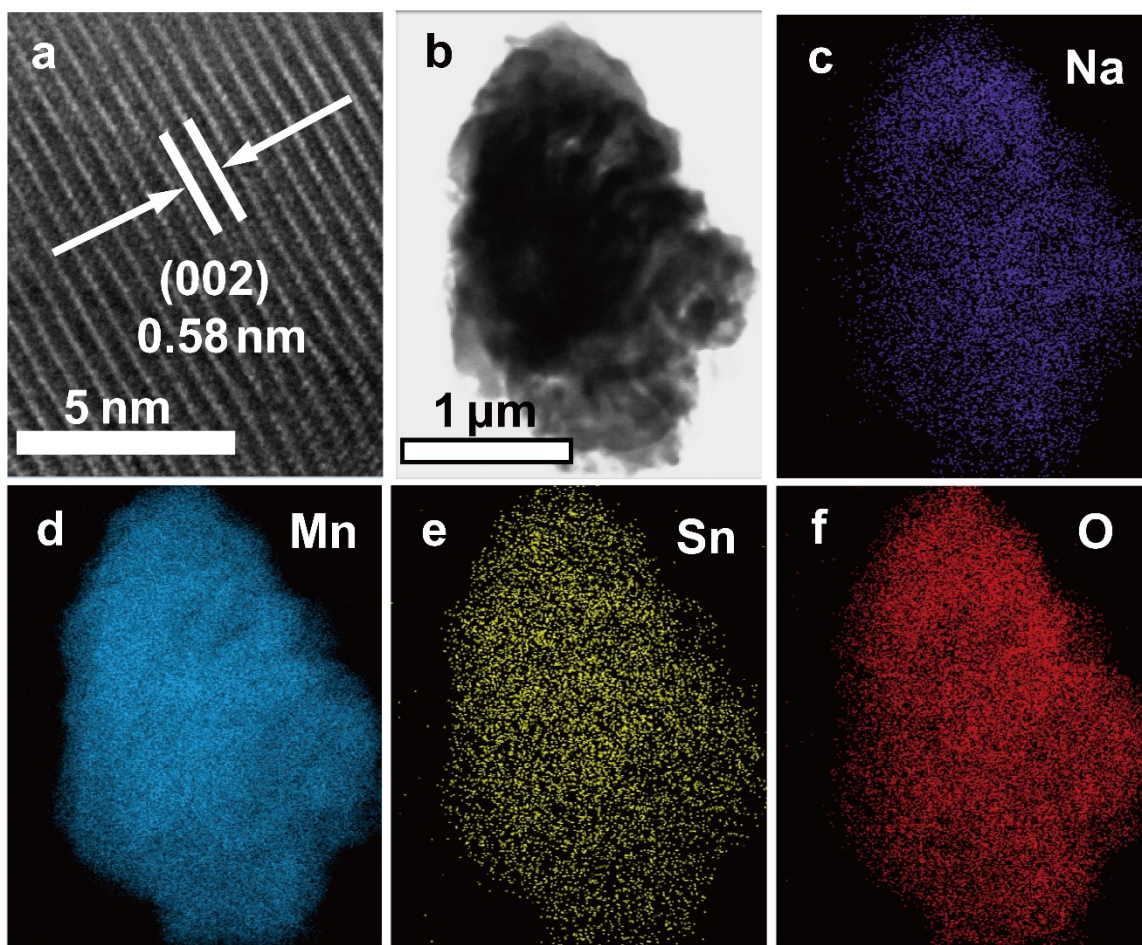

1

2 **Fig. S8.** (a) HRTEM image of NSMO after 10 cycles and (b-f) the corresponding EDS elemental mappings.

3

4

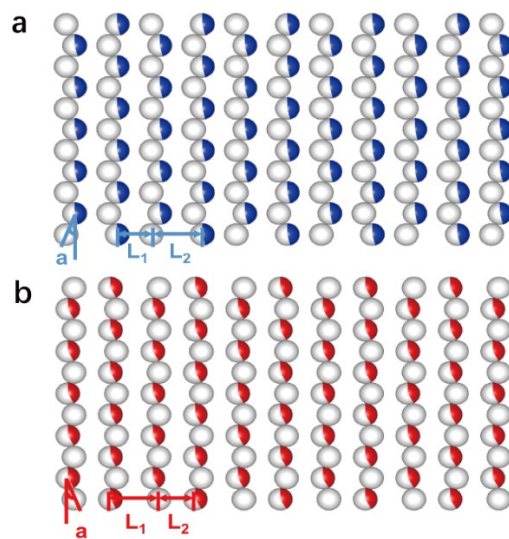

1

2 **Fig. S9.** Top view of the Na layers for (a) NMO and (b) NSMO based on XRD refined data.

3

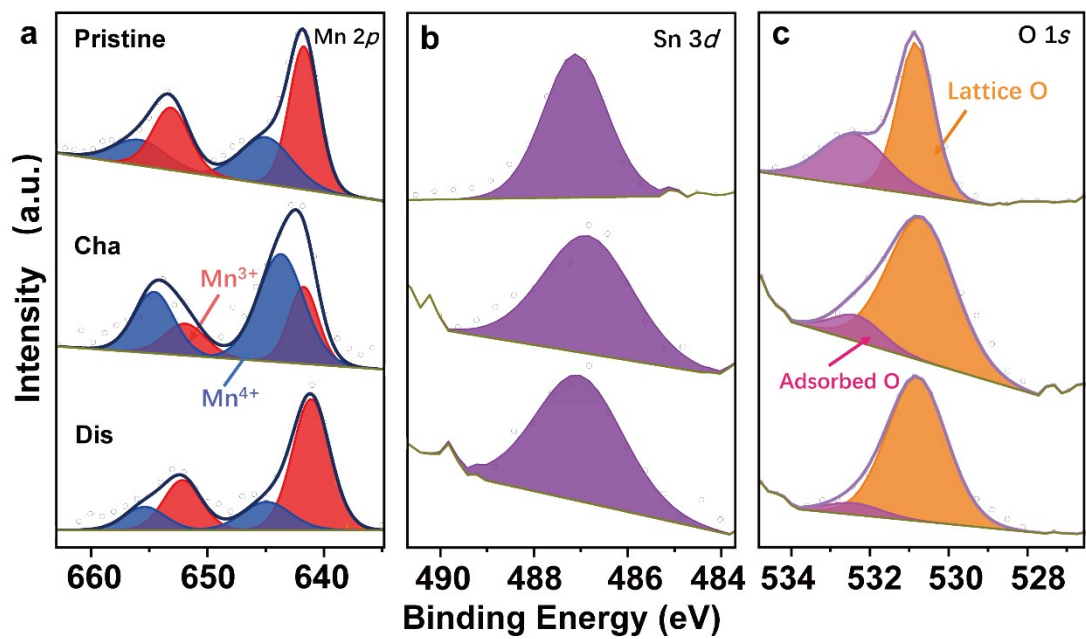

1

2 **Fig. S10.** Charge compensation mechanism of NSMO characterized by ex-situ XPS. (a) Mn 2p spectra. (b)

3 Sn 3d spectra. (c) O 1s spectra.

4

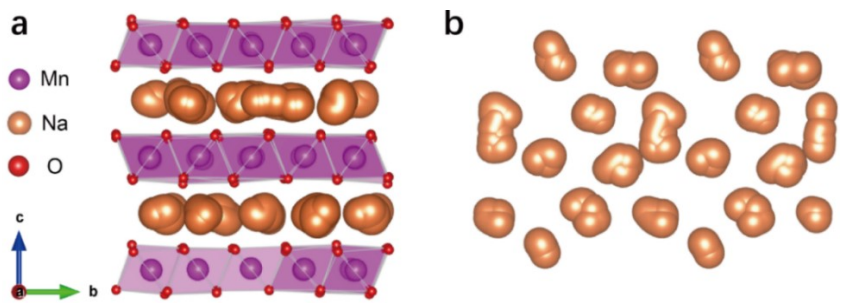

1

2 **Fig. S11.** (a) Trajectories of Na<sup>+</sup> in NMO simulated at 900 K. (b) Top view of Na layer.

3

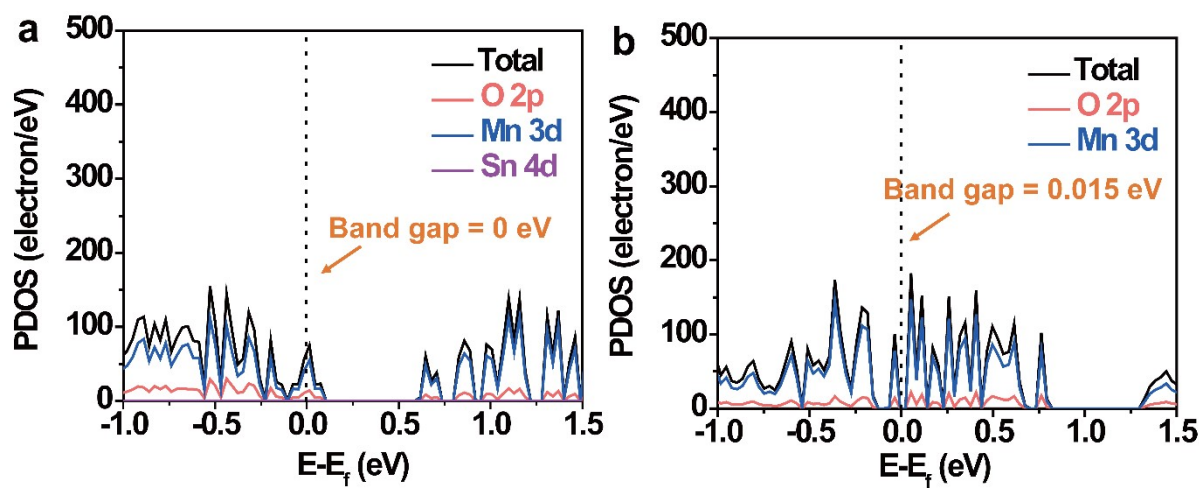

1

2 Fig. S12. The calculated DOS for NSMO (a) and NMO (b).

3

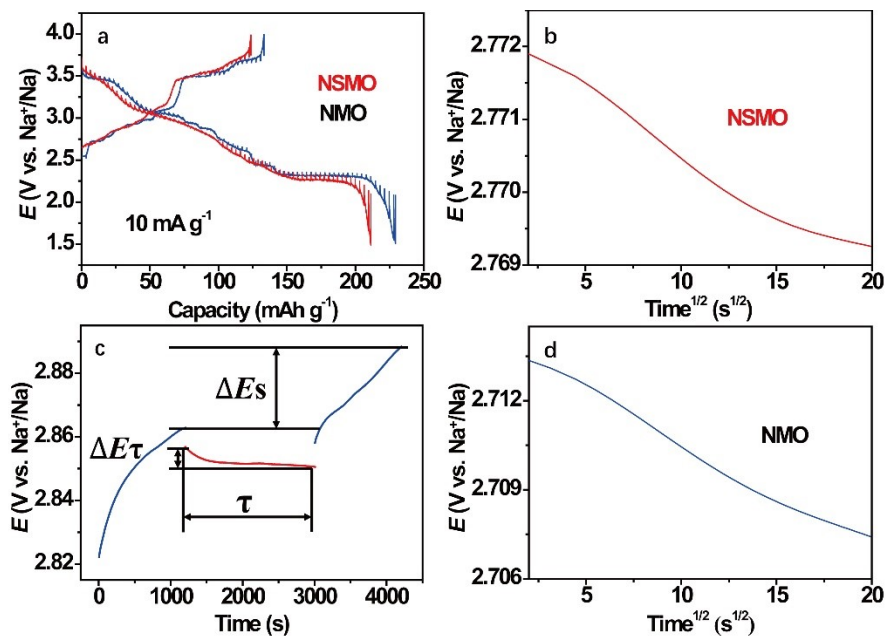

1

2 **Fig. S13.** (a) GITT curves of NMO and NSMO. The linear relationship between voltage (E) and square root  
 3 of resting time ( $\text{Time}^{1/2}$ ) for (b) NSMO and (d) NMO. (c) Current step diagram of the first desodiation of  
 4 NMO at 2.535 V.

5

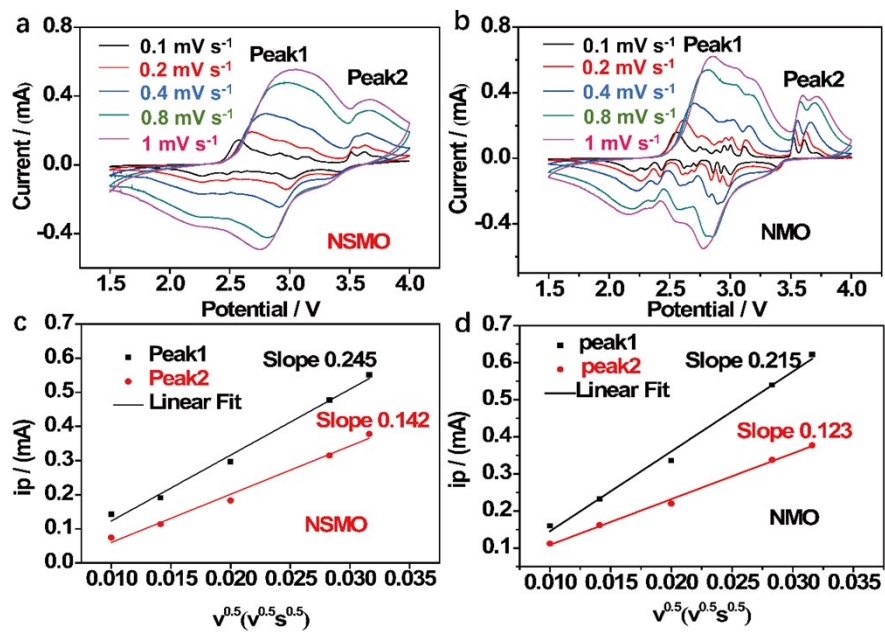

1

2 **Fig. S14.** CV curves of (a) NSMO and (b) NMO electrodes at different scan rates. Fitted plots of peak current  
 3 ( $i_p$ ) versus scan rate ( $v^{0.5}$ ) square root for (c) NSMO and (d) NMO electrodes.

4

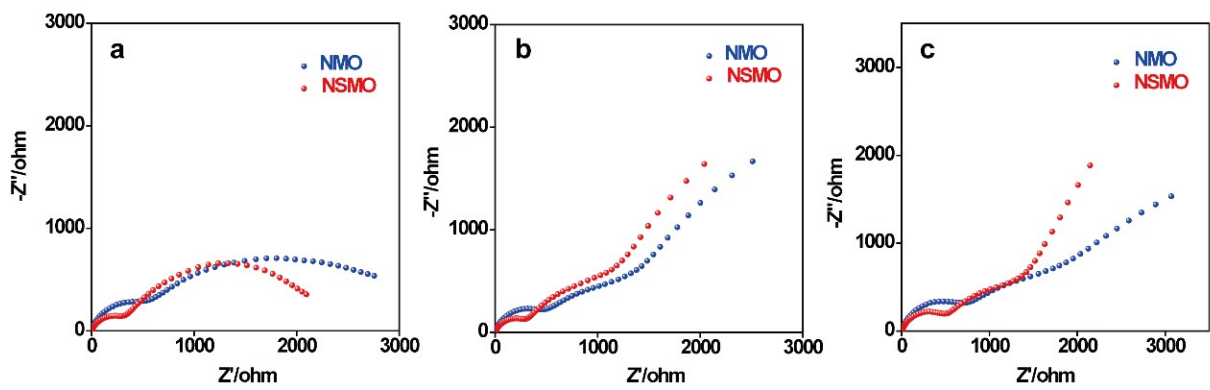

1

2 **Fig. S15.** EIS plots of NSMO and NMO (a) at open-circuit voltage and (b) after 1 cycle and (c) ten cycles.

3



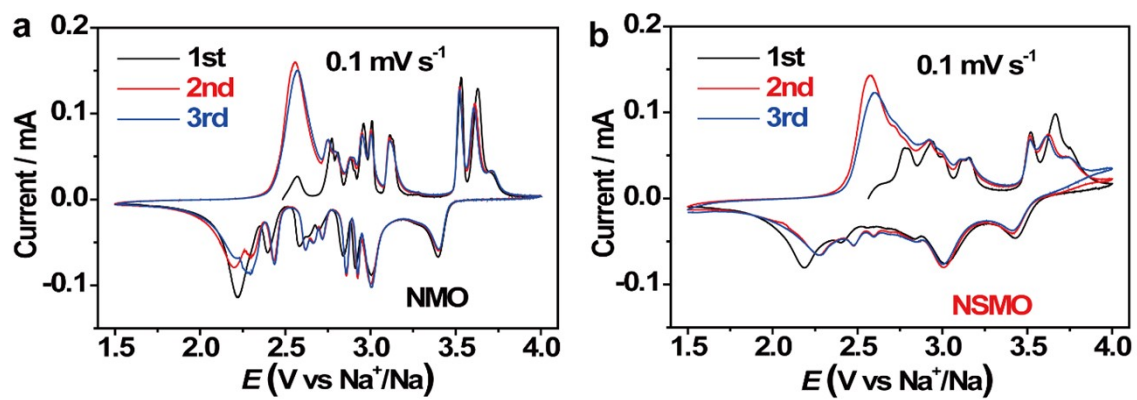

1

2 Fig. S16. CV curves of (a) NMO and (b) NSMO electrodes measured at  $0.1 \text{ mV s}^{-1}$  within 1.5-4.0 V.

3

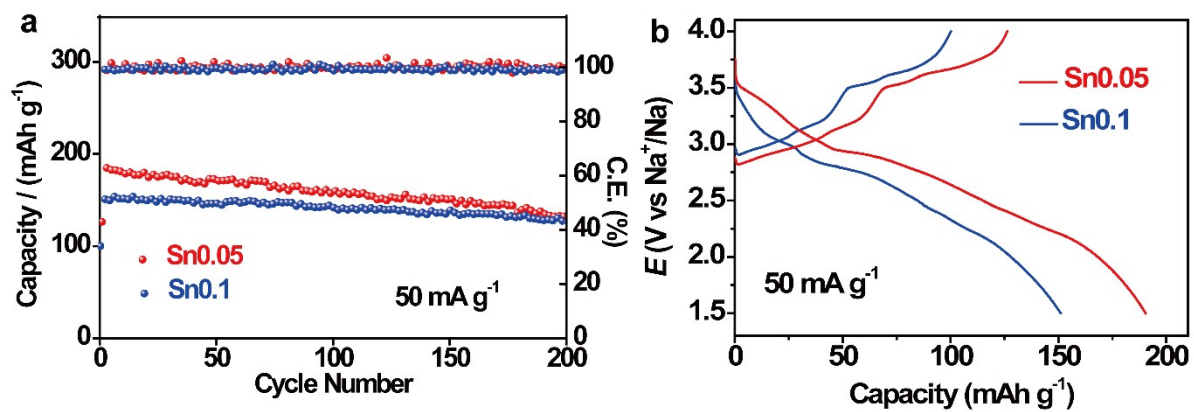

1  
 2 Fig. S17. (a) Cycle performance of NSMO and Na<sub>0.67</sub>Sn<sub>0.10</sub>Mn<sub>0.90</sub>O<sub>2</sub> and (b) their selected charge/discharge  
 3 curves.  
 4

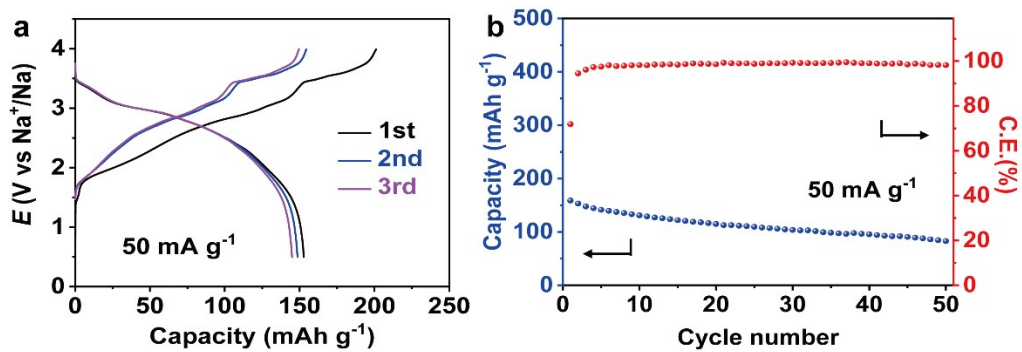

1

2 **Fig. S18.** (a) Charge/discharge profiles and (b) cycle performance of NSMO//HC full cells.

3

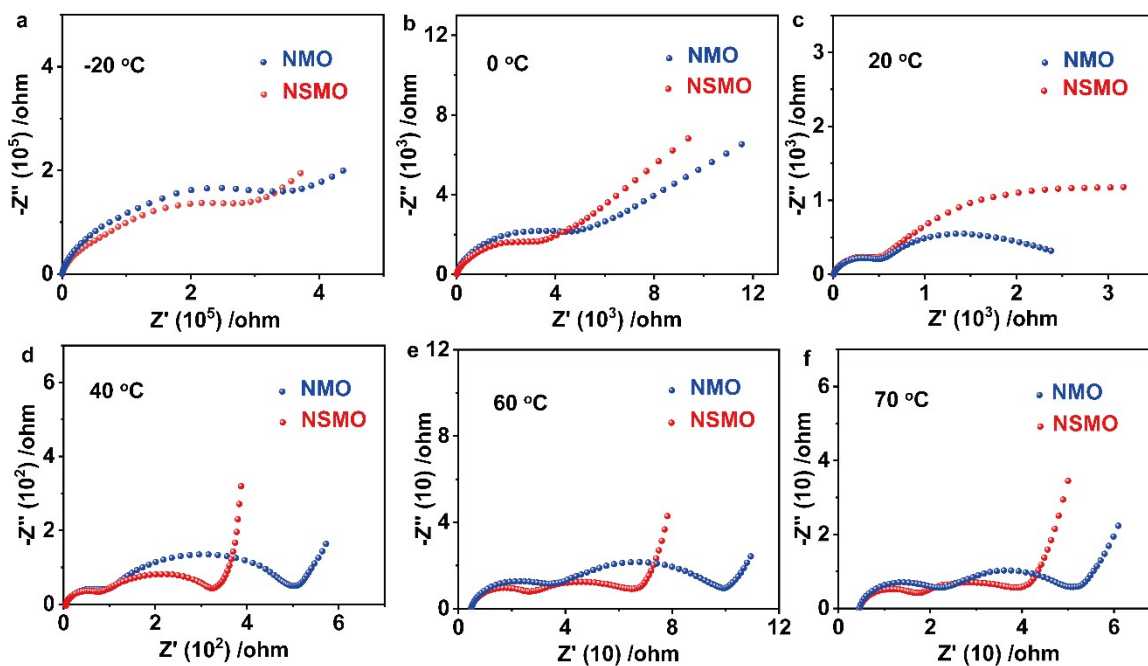

1

2 **Fig. S19.** EIS plots of NSMO and NMO at (a) -20 °C, (b) 0 °C, (c) 20 °C, (d) 40 °C, (e) 60 °C and (f) 70 °C  
 3 under open-circuit voltage.

4

1 **Table S1.** Lattice parameters of NSMO based on Rietveld refinement.

| <b>Atom</b>           | <b>Site</b> | <b>Occupancy</b> | <b>x</b> | <b>y</b> | <b>z</b> |
|-----------------------|-------------|------------------|----------|----------|----------|
| <b>Na<sub>f</sub></b> | 4c          | 0.25(9)          | 0        | 0.113    | 0.250    |
| <b>Na<sub>e</sub></b> | 4c          | 0.41(1)          | 0        | 0.673    | 0.250    |
| <b>Mn</b>             | 4a          | 0.95(5)          | 0        | 0        | 0        |
| <b>Sn</b>             | 4a          | 0.45(5)          | 0        | 0        | 0        |
| <b>O</b>              | 8f          | 1                | 0        | 0.675    | 0.890    |

**Space group:** *Cmcm*, a = 2.830 Å, b = 5.231 Å, c = 11.420 Å,  $\alpha = \beta = \gamma = 90^\circ$ , V = 169.059 Å<sup>3</sup>,  
Rwp = 4.3%

2

1 **Table S2.** Lattice parameters of NMO based on Rietveld refinement.

| <b>Atom</b>           | <b>Site</b> | <b>Occupancy</b> | <b>x</b> | <b>y</b> | <b>z</b> |
|-----------------------|-------------|------------------|----------|----------|----------|
| <b>Na<sub>f</sub></b> | 4c          | 0.21(9)          | 0        | 0.236    | 0.250    |
| <b>Na<sub>e</sub></b> | 4c          | 0.45(1)          | 0        | 0.696    | 0.250    |
| <b>Mn</b>             | 4a          | 1                | 0        | 0        | 0        |
| <b>O</b>              | 8f          | 1                | 0        | 0.669    | 0.899    |

**Space group:** *Cmcm*, a = 2.831 Å, b = 5.240 Å, c = 11.209 Å,  $\alpha = \beta = \gamma = 90^\circ$ , V = 166.279 Å<sup>3</sup>, Rwp = 4.3%

2

1 **Table S3.** Mn-O bond length, TMO<sub>2</sub> layer thicknesses, Na interlayer spacings, and distances between  
 2 adjacent Mn columns for NSMO and NMO.

|                     | $d_{(\text{Mn-O})}$ | $d_{(\text{MnO}_2)}$ | $d_{(\text{O-Na-O})}$ | $d_{(\text{interslab})}$ |
|---------------------|---------------------|----------------------|-----------------------|--------------------------|
| <b>NSMO (Å)</b>     | 2.01/1.95           | 2.20                 | 3.42                  | 5.71                     |
| <b>NMO (Å)</b>      | 2.07/2.01           | 2.26                 | 3.34                  | 5.60                     |
| <b>Change ratio</b> | 2.99%/3.08%         | 2.72%                | 2.34%                 | 1.92%                    |

3

1 **Table S4.** Refined structural parameters of OP4 phase in the charged NSMO electrode.

| <b>Atom</b>           | <b>Site</b> | <b>Occupancy</b> | <b>x</b> | <b>y</b> | <b>z</b> |
|-----------------------|-------------|------------------|----------|----------|----------|
| <b>Na<sub>r</sub></b> | 2d          | 0.04(1)          | 0.667    | 0.333    | 0.250    |
| <b>Na<sub>e</sub></b> | 2c          | 0.10(2)          | 0.333    | 0.667    | 0.250    |
| <b>Na<sub>1</sub></b> | 2a          | 0.05(1)          | 0        | 0        | 0.5      |
| <b>Mn</b>             | 4f          | 0.95             | 0.667    | 0.333    | 0.360    |
| <b>Sn</b>             | 4f          | 0.05             | 0.667    | 0.333    | 0.360    |
| <b>O1</b>             | 4f          | 0.5              | 0.333    | 0.667    | 0.415    |
| <b>O2</b>             | 4e          | 0.5              | 0        | 0        | 0.296    |

**Space group:** *P63/mmc*,  $a = 2.952 \text{ \AA}$ ,  $b = 2.952 \text{ \AA}$ ,  $c = 22.188 \text{ \AA}$ ,  $\alpha = \beta = 90^\circ$ ,  $\gamma = 120^\circ$ ,  $V = 167.449 \text{ \AA}^3$ ,  $\Delta V\% = 0.95\%$ ,  $R_{wp} = 1.9\%$

2



1 **Table S5.** Refined structural parameters of P''2 phase in the discharged NSMO and NMO electrodes.

| Sample | Atom            | Site | Occupancy | x | y      | z      |
|--------|-----------------|------|-----------|---|--------|--------|
| NSMO   | Na <sub>f</sub> | 4c   | 0.45(2)   | 0 | 1.712  | 0.250  |
|        | Na <sub>e</sub> | 4c   | 0.47(6)   | 0 | -4.154 | 0.250  |
|        | Mn              | 4a   | 0.94(3)   | 0 | 0      | 0      |
|        | Sn              | 4a   | 0.05(7)   | 0 | 0      | 0      |
|        | O               | 8f   | 1         | 0 | 1.473  | -2.387 |
| NMO    | Na <sub>f</sub> | 4c   | 0.45(9)   | 0 | 0.645  | 0.250  |
|        | Na <sub>e</sub> | 4c   | 0.51(1)   | 0 | 0.646  | 0.250  |
|        | Mn              | 4a   | 1         | 0 | 0      | 0      |
|        | O               | 8f   | 1         | 0 | 0.199  | -0.047 |

**Space group: NSMO:** *Cmcm*, a = 2.89 Å, b = 5.42 Å, c = 10.74 Å,  $\alpha = \beta = \gamma = 90^\circ$ , V = 168.23 Å<sup>3</sup>,  $\Delta V\% = 0.49\%$ , Rwp = 4.5%; **NMO:** *Cmcm*, a = 2.89 Å, b = 5.66 Å, c = 10.89 Å,  $\alpha = \beta = \gamma = 90^\circ$ , V = 178.13 Å<sup>3</sup>,  $\Delta V\% = 7.1\%$ , Rwp = 8%

2

1 **Table S6.** Refined structural parameters of OP4 and P2 phases in the charged NMO electrode.

| Phase      | Atom                  | Site | Occupancy | x     | y     | z     |
|------------|-----------------------|------|-----------|-------|-------|-------|
| <b>OP4</b> | <b>Na<sub>f</sub></b> | 2d   | 0.02(7)   | 0.667 | 0.333 | 0.250 |
|            | <b>Na<sub>e</sub></b> | 2c   | 0.06(8)   | 0.333 | 0.667 | 0.250 |
|            | <b>Na<sub>1</sub></b> | 2a   | 0.03(5)   | 0     | 0     | 0.5   |
|            | <b>Mn</b>             | 4f   | 1         | 0.667 | 0.333 | 0.373 |
|            | <b>O<sub>1</sub></b>  | 4f   | 0.5       | 0.333 | 0.667 | 0.402 |
|            | <b>O<sub>2</sub></b>  | 4e   | 0.5       | 0     | 0     | 0.328 |
| <b>P2</b>  | <b>Na<sub>f</sub></b> | 4f   | 0.00(5)   | 0.333 | 0.667 | 0.582 |
|            | <b>Na<sub>e</sub></b> | 2b   | 0.00(5)   | 0     | 0     | 0.250 |
|            | <b>Mn</b>             | 2a   | 1         | 0     | 0     | 0     |
|            | <b>O</b>              | 4f   | 1         | 0.333 | 0.667 | 0.582 |

**Space group: OP4:** *P63/mmc*, a = 2.99 Å, b = 2.99 Å, c = 18.87 Å,  $\alpha = \beta = 90^\circ$ ,  $\gamma = 120^\circ$ , V = 146.30 Å<sup>3</sup>,  $\Delta V\% = 12\%$ , Rwp = 3.6%, wt% = 83.8%; **P2:** *P63/mmc*, a = 2.82 Å, b = 2.82 Å, c = 11.24 Å,  $\alpha = \beta = \gamma = 90^\circ$ , V = 77.32 Å<sup>3</sup>,  $\Delta V\% = 53.5\%$ , Rwp = 3.6%, wt% = 16.2%

2

1 **Table S7.** Distances and angles between Na<sub>f</sub> and Na<sub>e</sub> in Na layers for P2-NMO, P'2-NMO and P'2-NSMO  
2 based on Rietveld refinement.

| Sample   | a (°) | L1 (Å) | L2 (Å) | ΔL (Å) |
|----------|-------|--------|--------|--------|
| P2-NMO   | 60.0  | 1.6    | 3.3    | 1.7    |
| P'2-NMO  | 20.5  | 2.1    | 3.2    | 1.1    |
| P'2-NSMO | 14.7  | 2.3    | 3.0    | 0.7    |

3

1 **Table S8.** Na<sup>+</sup> diffusion coefficients of peak 1 and 2 obtained by CV.

| <b>Peak</b> | <b>NSMO (cm<sup>2</sup>s<sup>-1</sup>)</b> | <b>NMO (cm<sup>2</sup>s<sup>-1</sup>)</b> |
|-------------|--------------------------------------------|-------------------------------------------|
| <b>1</b>    | 2.25×10 <sup>-10</sup>                     | 2.97×10 <sup>-11</sup>                    |
| <b>2</b>    | 2.26×10 <sup>-11</sup>                     | 1.20×10 <sup>-11</sup>                    |

2  
3

1 **Table S9.** Electrochemical performance comparison of some reported cathodes in SIBs.

| Materials                                                                                    | Cyclability (capacity retention)                                             | Rate Capability                                                                                           | Ref       |
|----------------------------------------------------------------------------------------------|------------------------------------------------------------------------------|-----------------------------------------------------------------------------------------------------------|-----------|
| NSMO                                                                                         | 131.2 mAh g <sup>-1</sup> (71.63%) after 200 cycles at 50 mA g <sup>-1</sup> | 218.4 mAh g <sup>-1</sup> at 10 mA g <sup>-1</sup><br>143.2 mAh g <sup>-1</sup> at 500 mA g <sup>-1</sup> | This work |
| poly(diphenylaminesulfonic acid sodium) (PDS)                                                | 72 mAh g <sup>-1</sup> (70%) after 100 cycles at 50 mA g <sup>-1</sup>       | 92 mAh g <sup>-1</sup> at 100 mA g <sup>-1</sup><br>75 mAh g <sup>-1</sup> at 200 mA g <sup>-1</sup>      | 50        |
| NaFePO <sub>4</sub>                                                                          | 100 mAh g <sup>-1</sup> (90%) after 240 cycles at 15.4 mA g <sup>-1</sup>    | 120 mAh g <sup>-1</sup> at 7.7 mA g <sup>-1</sup><br>46 mAh g <sup>-1</sup> at 308 mA g <sup>-1</sup>     | 51        |
| Na <sub>0.7</sub> Mn <sub>0.6</sub> Ni <sub>0.3</sub> Co <sub>0.1</sub> O <sub>2</sub>       | 69.6 mAh g <sup>-1</sup> (58%) after 20 cycles at 9 mA g <sup>-1</sup>       | 120 mAh g <sup>-1</sup> at 9 mA g <sup>-1</sup><br>80 mAh g <sup>-1</sup> at 185 mA g <sup>-1</sup>       | 52        |
| Na <sub>0.66</sub> (Mn <sub>0.54</sub> Co <sub>0.13</sub> Ni <sub>0.13</sub> )O <sub>2</sub> | 60.5 mA g <sup>-1</sup> (50%) after 100 cycles at 160 mA g <sup>-1</sup>     | 121 mAh g <sup>-1</sup> at 160 mA g <sup>-1</sup><br>94 mAh g <sup>-1</sup> at 800 mA g <sup>-1</sup>     | 53        |
| Na <sub>0.44</sub> MnO <sub>2</sub>                                                          | 75.0 mA g <sup>-1</sup> (63%) after 60 cycles at 24.2 mA g <sup>-1</sup>     | 102 mAh g <sup>-1</sup> at 60 mA g <sup>-1</sup><br>98 mAh g <sup>-1</sup> at 121 mA g <sup>-1</sup>      | 54        |

2
